# Supplementary material for: Comparison of intravitreal injection of ranibizumab versus bevacizumab for treatment of type 1 and aggressive retinopathy of prematurity in rural Egypt. A randomized clinical trial
Source: HighWire-hosted journal article supplement (doi:10.1136/bmjophth-2022-001173), 2022-12-01

# CONSORT Flow Diagram of Comparison Of Intravitreal Injection Of Ranibizumab Versus Bevacizumab For Treatment Of Type 1 And Aggressive Retinopathy Of Prematurity

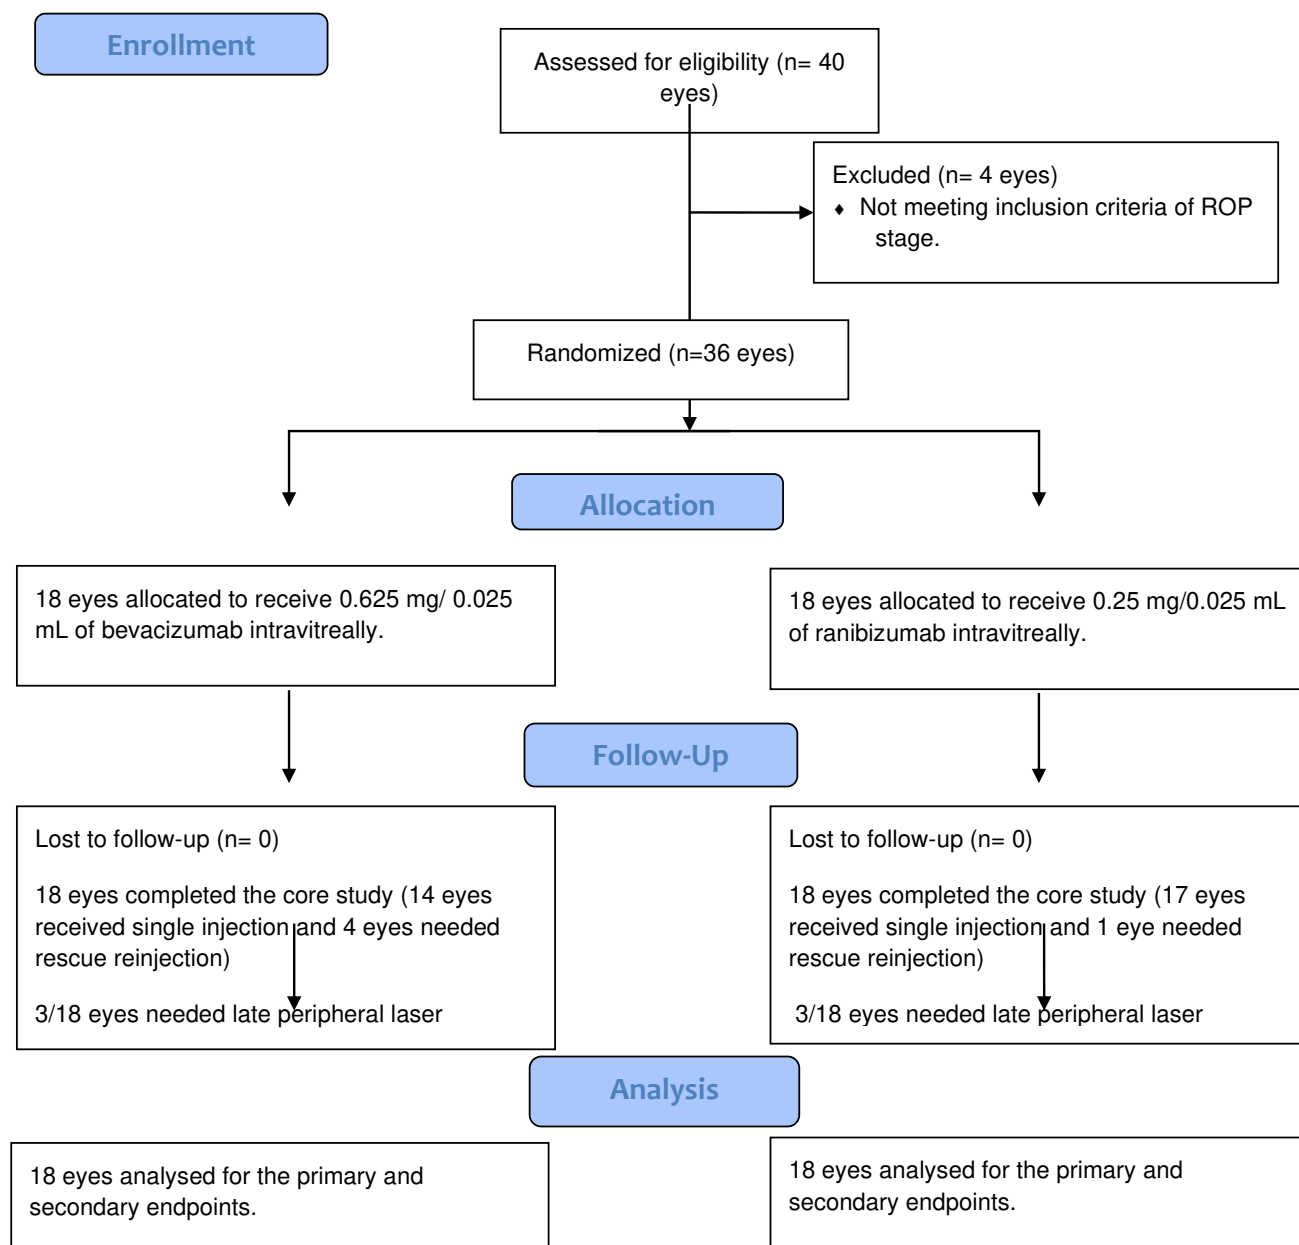

Supplement: bmjophth-2022-001173supp001_data_supplement.pdf [file bmjophth-2022-001173supp001_data_supplement.pdf]
